Correction

## Correction: Alterations of tumor microenvironment by carbon monoxide impedes lung cancer growth

Zsuzsanna Nemeth<sup>1,4</sup>, Eva Csizmadia<sup>1</sup>, Lisa Vikstrom<sup>1</sup>, Mailin Li<sup>1</sup>, Kavita Bisht<sup>1,5</sup>, Alborz Feizi<sup>1</sup>, Sherrie Otterbein<sup>6</sup>, Brian Zuckerbraun<sup>6</sup>, Daniel B. Costa<sup>2,3</sup>, Pier Paolo Pandolfi<sup>2,3</sup>, Janos Fillinger<sup>7</sup>, Balazs Döme<sup>4,8,9</sup>, Leo E. Otterbein<sup>1</sup> and Barbara Wegiel<sup>1,2</sup>

<sup>1</sup>Department of Surgery, Transplant Institute, Beth Israel Deaconess Medical Center, Harvard Medical School, Boston, MA, USA

<sup>2</sup>Cancer Center Institute, Beth Israel Deaconess Medical Center, Harvard Medical School, Boston, MA, USA

<sup>3</sup>Department of Medicine, Beth Israel Deaconess Medical Center, Harvard Medical School, Boston, MA, USA

<sup>4</sup>Department of Tumor Biology, National Koranyi Institute of TB and Pulmonology, Budapest, Hungary

<sup>5</sup>Heart Foundation Research Center, Griffith Health Institute, Griffith University, Gold Coast, Australia

<sup>6</sup>Department of Surgery, Section of Trauma and Acute Care Surgery, University of Pittsburgh Medical Center, Pittsburgh, PA, USA

<sup>7</sup>Department of Pathology, National Koranyi Institute of TB and Pulmonology, Budapest, Hungary

<sup>8</sup>Division of Thoracic Surgery, Department of Surgery, Comprehensive Cancer Center, Medical University of Vienna, Austria

<sup>9</sup>Department of Thoracic Surgery, National Institute of Oncology, Budapest, Hungary

**Published:**

**Copyright:** © 2021 Nemeth et al. This is an open access article distributed under the terms of the [Creative Commons Attribution License](#) (CC BY 3.0), which permits unrestricted use, distribution, and reproduction in any medium, provided the original author and source are credited.

**This article has been corrected:** In Figure 5D, the B-actin band appears to show 13 lanes, while the labeling suggests there should be only 12. The first lane of the actin band out of the 13 displayed is an overflow from the first well included in the paper by error. The corrected Figure 5D, produced from the original data, is shown below. The authors declare that these corrections do not change the results or conclusions of this paper.

Original article: Oncotarget. 2016; 7:23919–23932. <https://doi.org/10.18632/oncotarget.8081>

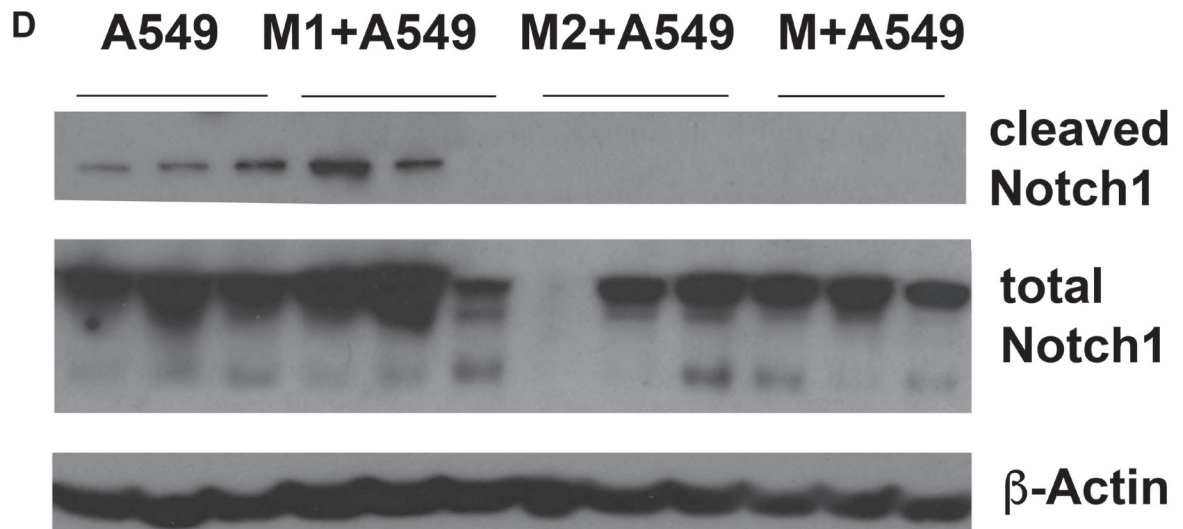

**Figure 5: (D)** Western blot with antibodies against HO-1, P-Erk1/2, cleaved Notch1 and total Notch1 in A549 xenografts as in A. Data are representative for  $n = 3$  per group.
